# Supplementary material for: Synthesis of N-Tetradecyl-1,10-phenathrolinium-Based New Salts for Biological Applications
Source: Hindawi journal article supplement (doi:10.1155/2018/8097483), 2018-07-17
Supplement: f1 [file 8097483.f1.pdf]

## Supporting Information

### NMR Spectra

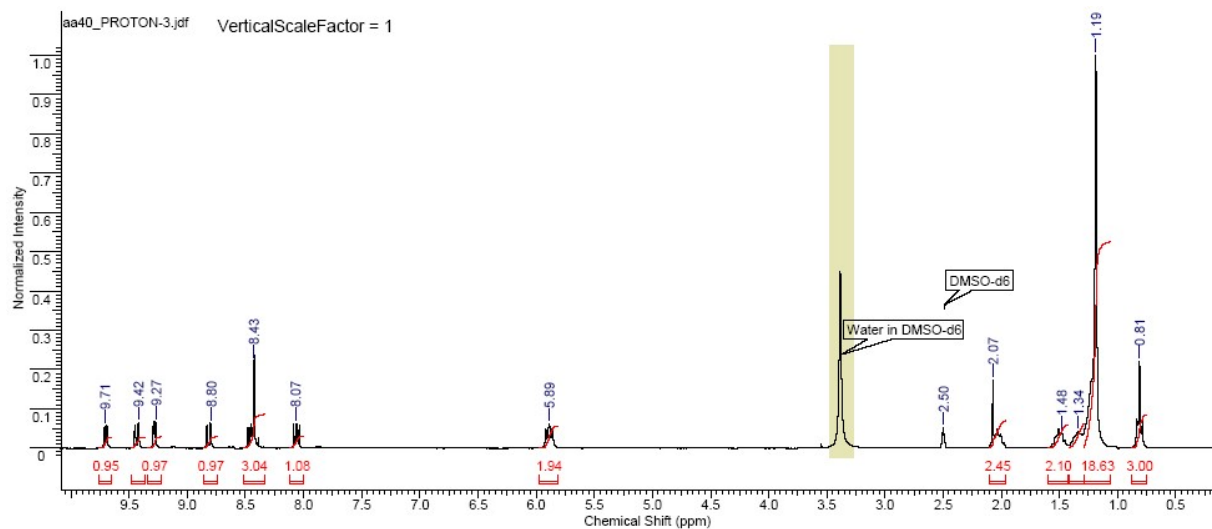

a

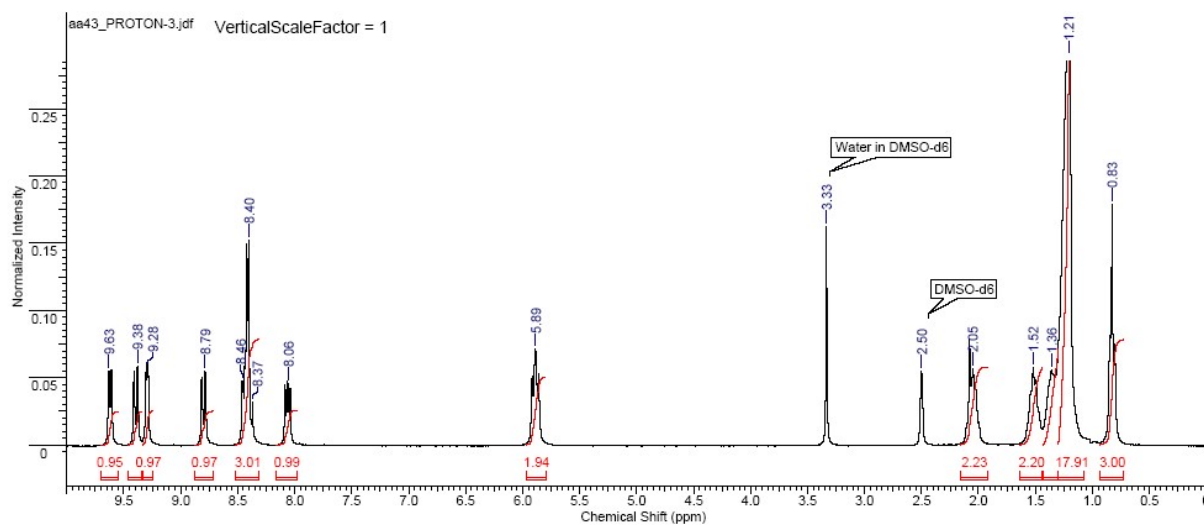

b

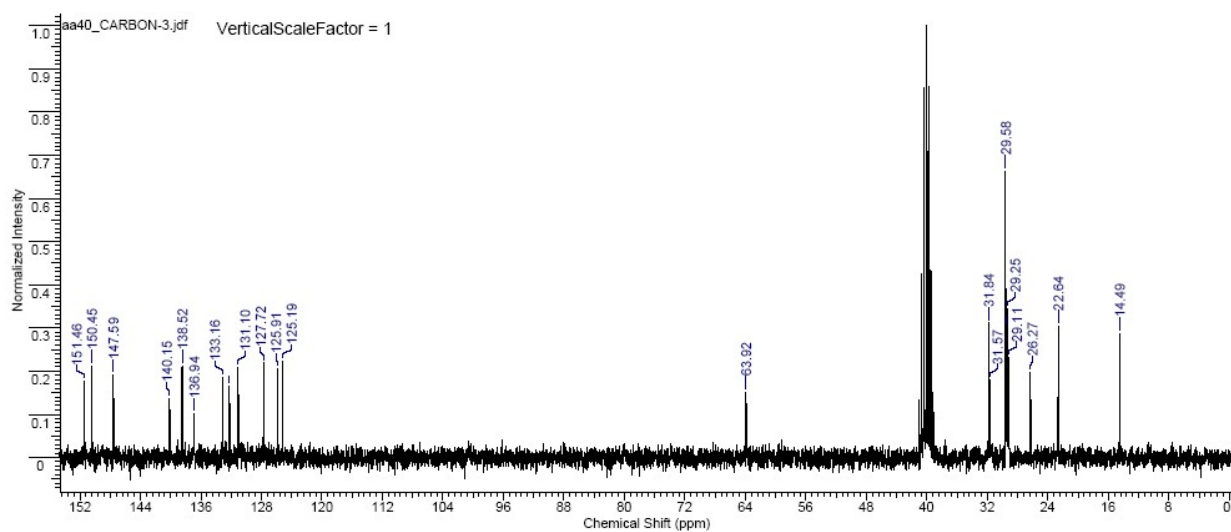

c

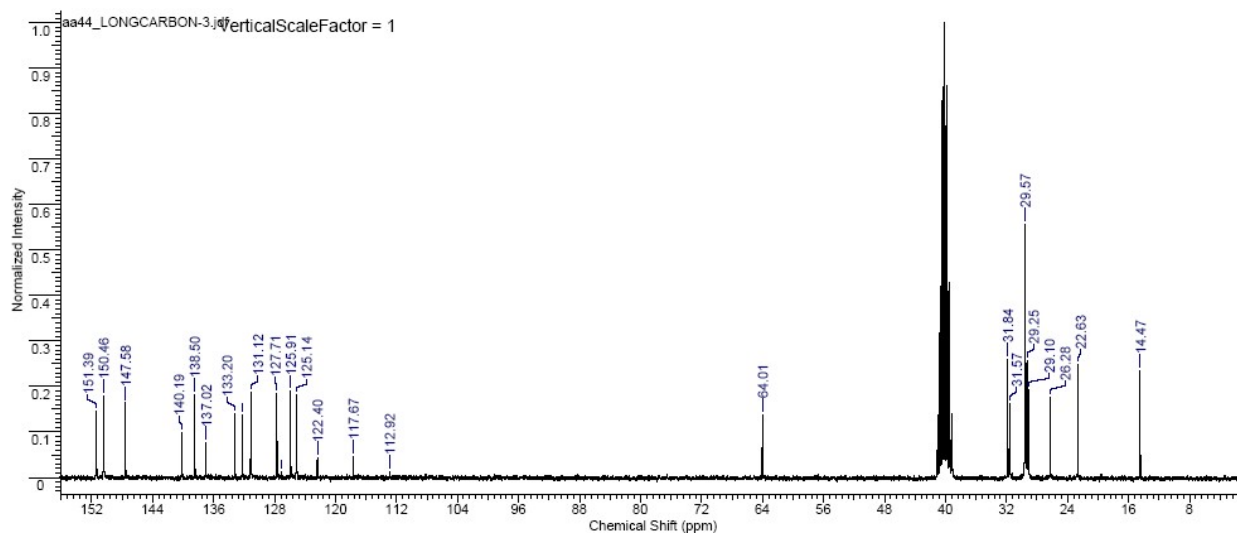

d

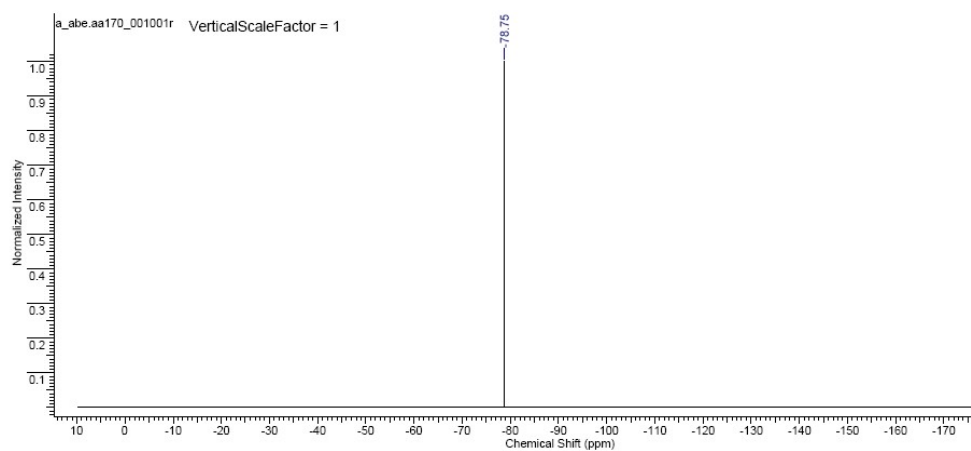

e

Figure 1: a)  $^1\text{H}$  NMR of  $[\text{C}_{26}\text{H}_{37}\text{N}_2]\text{Br}$ , b)  $^1\text{H}$  NMR of  $[\text{C}_{26}\text{H}_{37}\text{N}_2][(\text{CF}_3\text{SO}_2)_2\text{N}]$ , c)  $^{13}\text{C}$  NMR of  $[\text{C}_{26}\text{H}_{37}\text{N}_2]\text{Br}$ , d)  $^{13}\text{C}$  NMR of  $[\text{C}_{26}\text{H}_{37}\text{N}_2][(\text{CF}_3\text{SO}_2)_2\text{N}]$ , e)  $^{19}\text{F}$  NMR of  $[\text{C}_{26}\text{H}_{37}\text{N}_2][(\text{CF}_3\text{SO}_2)_2\text{N}]$

## Thermograms

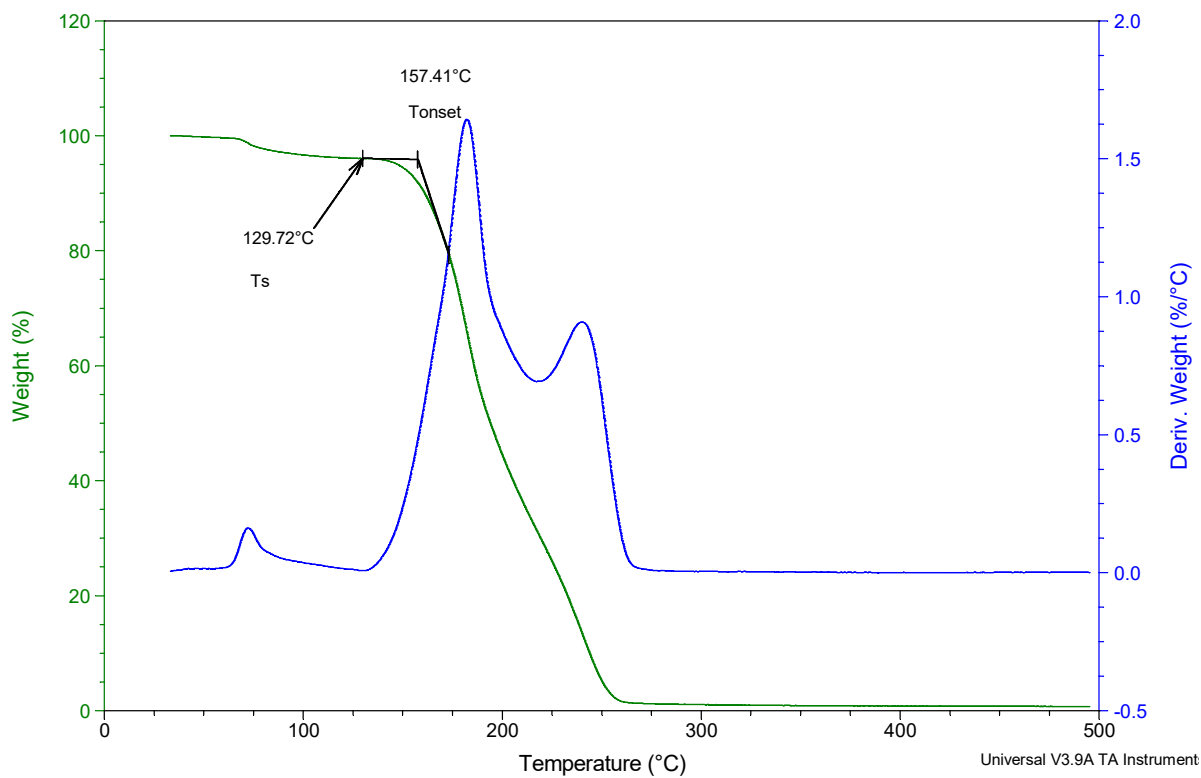

a

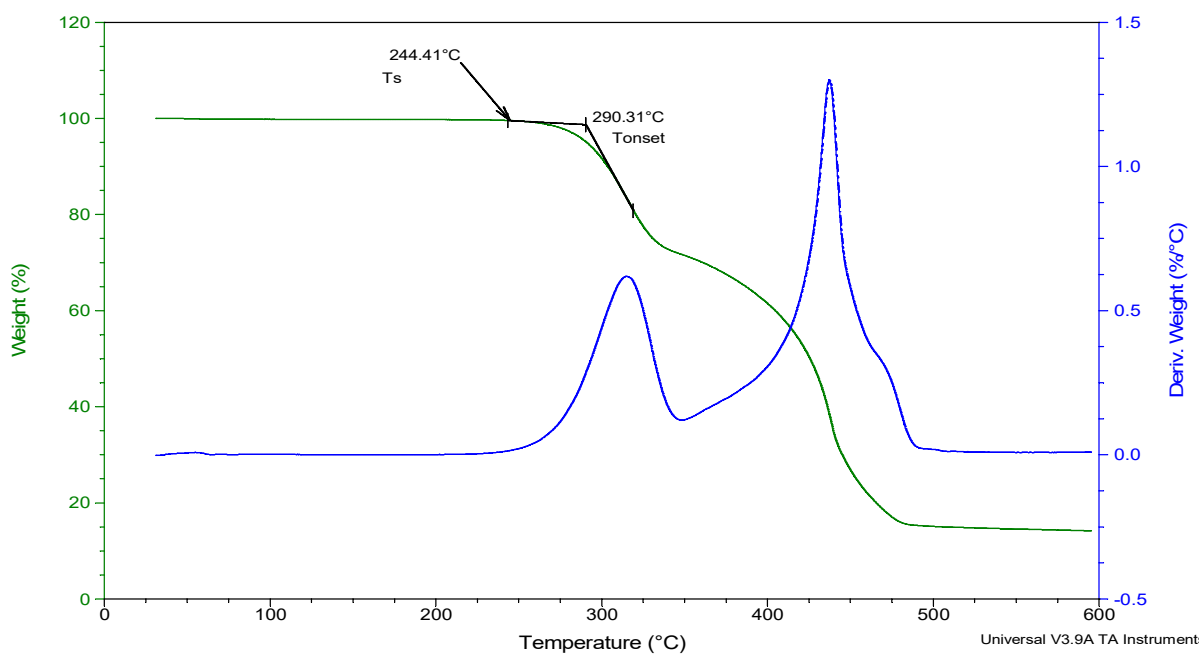

B

Figure 2: Characteristic decomposition curve determined by TGA, indicating the start and onset temperatures of: a)  $[\text{C}_{26}\text{H}_{37}\text{N}_2]\text{Br}$ , b)  $[\text{C}_{26}\text{H}_{37}\text{N}_2][(\text{CF}_3\text{SO}_2)_2\text{N}]$

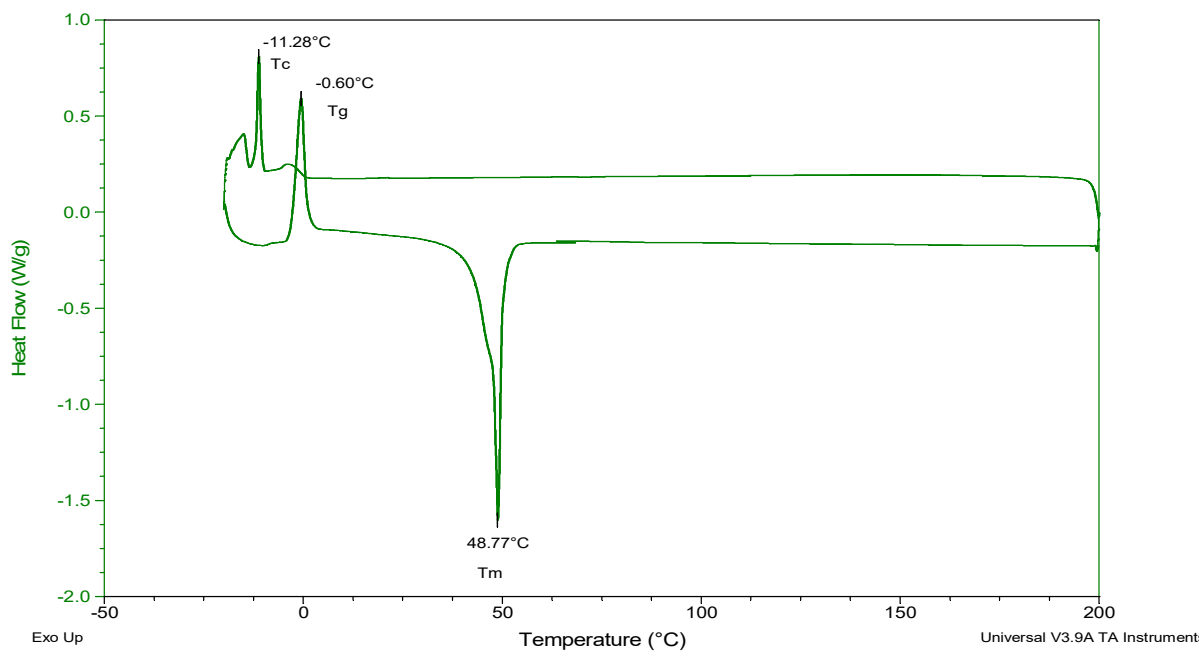

Figure 3: Characteristic phase transition of  $[\text{C}_{26}\text{H}_{37}\text{N}_2][(\text{CF}_3\text{SO}_2)_2\text{N}]$ , determined by DSC, indicating the melting and crystallization temperatures of  $[\text{C}_{26}\text{H}_{37}\text{N}_2][(\text{CF}_3\text{SO}_2)_2\text{N}]$
